# Supplementary material for: Novel AgNbO3-based lead-free ceramics featuring excellent pyroelectric properties for infrared detecting and energy-harvesting applications via antiferroelectric/ferroelectric phase-boundary design
Source: Royal Society of Chemistry journal article supplement (doi:10.1039/c9tc01014a), 2019-01-01
Supplement: c9tc01014a1.pdf [file c9tc01014a1.pdf]

### Supplementary Information

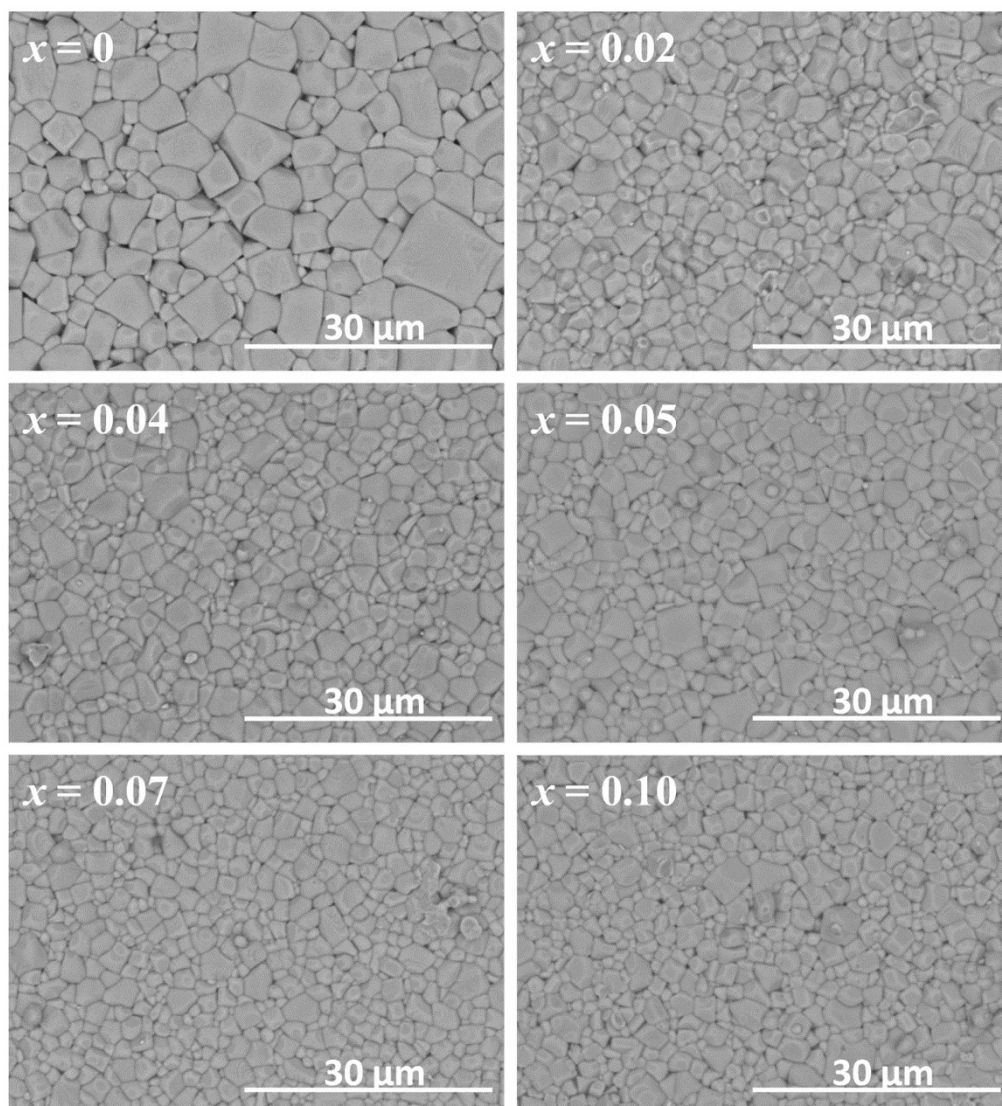

Fig. S1 SEM images for  $(1-x)\text{AgNbO}_3-x\text{LiTaO}_3$  ceramics.

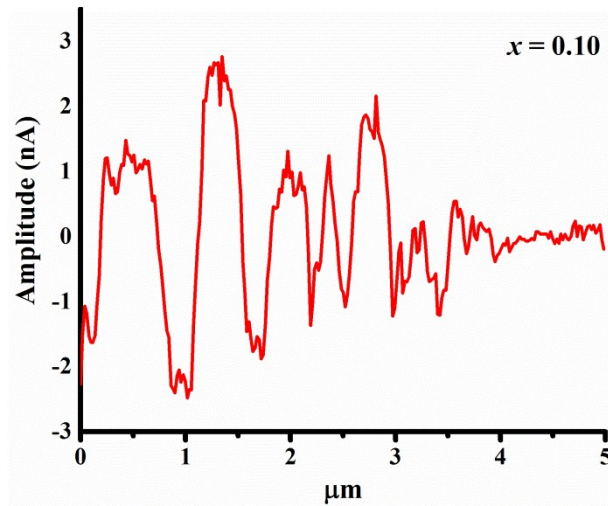

Fig. S2 Corresponding piezoresponse amplitude profiles generated from the line scan across the domains for the  $0.9\text{AgNbO}_3\text{-}0.10\text{LiTaO}_3$  ceramic.

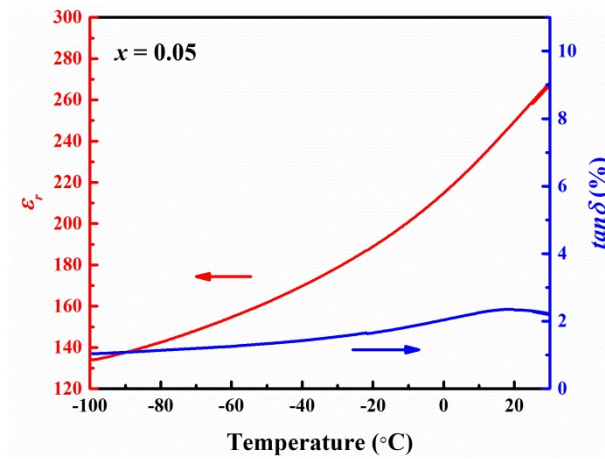

Fig. S3 Temperature dependence of the dielectric properties of the  $0.95\text{AgNbO}_3\text{-}0.05\text{LiTaO}_3$  ceramic at low temperature.

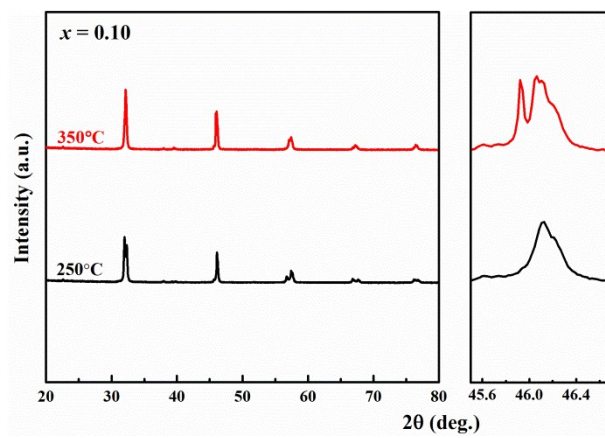

Fig. S4 Temperature dependent XRD patterns of the  $0.90\text{AgNbO}_3\text{-}0.10\text{LiTaO}_3$  ceramic.

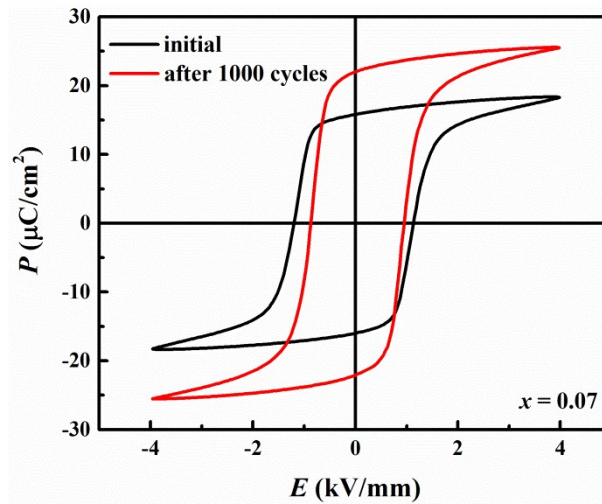

Fig. S5 Polarization-electric field ( $P$ - $E$ ) hysteresis loops of the  $0.93\text{AgNbO}_3$ - $0.07\text{LiTaO}_3$  ceramic with an increasing number of electric cycles.

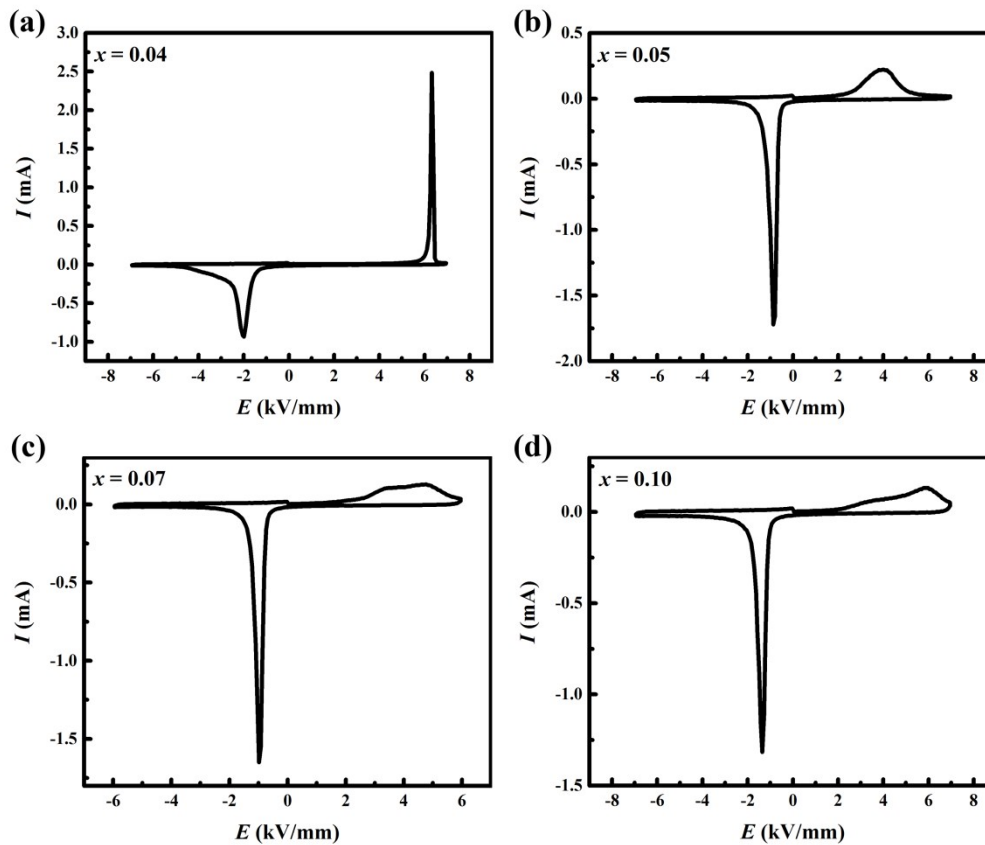

Fig. S6 First current-electric field ( $I$ - $E$ ) hysteresis loops of the fresh  $(1-x)\text{AgNbO}_3$ - $x\text{LiTaO}_3$  ceramics at room temperature.
